# Supplementary material for: Hippocampal Spatial Position Evaluation on MRI for Research and Clinical Practice
Source: PLoS One. 2014 Dec 12;9(12):e115174. doi: 10.1371/journal.pone.0115174 (PMC4264873; doi:10.1371/journal.pone.0115174)
Supplement: S1 Data — Table of raw data used in the calculations. (XLS) [file pone.0115174.s001.xls]

## Sheet: Sheet1
Nat_Hippocampal area (mm2)	Nat_Hipp+horn area (mm2)	Nativ_Hippocampo-horn proportion - =A/B*100	Hippocampal position	Hipp_Hippocampal area (mm2)	Hipp_Hipp+horn area (mm2)	Hipp_Hippocampo-horn proportion - =E/F*100	Commisural position	Comm_Hippocampal area (mm2)	Comm_Hipp+horn area (mm2)	Comm_Hippocampo-horn proportion - =I/J*100			angles CA-CP to nat		angles HIPPO SIN to nat		angles HIPPO DEX to nat
3.347	4.653	71.9321		2.816	4.408	63.8838		3.449	4.959	69.5503			-17		-8		-7
2.98	4.49	66.3697		2.918	4.041	72.2098		3.102	4.327	71.6894
2.837	4.939	57.4408		3.265	4.469	73.0588		3.061	4.796	63.824			2		11		14
4.367	5.265	82.944		3.388	4.714	71.871		3.735	5.224	71.4969
3.245	5.082	63.8528		3.224	4.796	67.2227		3.51	5.449	64.4155			-8		19		16
2.061	3.531	58.3687		1.939	3.224	60.1427		1.796	3.347	53.66
2.918	4.816	60.5897		2.714	4.265	63.6342		2.939	4.592	64.0026			-2		16		20
3.245	4.306	75.36		3.02	4.224	71.4962		3.061	4.816	63.559
3.245	4.551	71.303		3.163	4.184	75.5975		3.755	4.612	81.418			-1		20		18
4.102	5.143	79.7589		3.551	4.327	82.0661		4.306	5.653	76.1719
2.224	3.592	61.9154		2.388	3.673	65.015		2.51	3.531	71.0847			5		0		-8
3.388	4.531	74.7738		3.265	4.592	71.1019		3.673	4.633	79.2791
3.204	5.122	62.5537		3.204	5.122	62.5537		3.959	6.367	62.18			-15		6		4
3.163	5.061	62.4975		2.959	4.816	61.441		3.122	5	62.44
2.388	3.837	62.2361		2.388	3.837	62.2361		2.122	4.245	49.9882			-6		11		11
3.245	4.408	73.6162		2.939	4.122	71.3003		3.245	4.612	70.3599
3.449	4.327	79.7088		3.061	3.531	86.6893		3.327	4.408	75.4764			6		21		16
2.939	3.857	76.1991		2.612	3.694	70.7093		2.98	4.02	74.1294
3.612	4.776	75.6281		3.347	4.592	72.8876		3.102	4.49	69.0869			-27		-17		-17
3.531	4.776	73.9322		3.265	4.633	70.4727		3.408	4.429	76.9474
2.02	3.061	65.9915		2.163	3.02	71.6225		2.204	3.592	61.3586			-10		8		8
3.408	5.347	63.7367		2.633	4.122	63.8768		2.755	4.469	61.6469
3.245	4.224	76.8229		3.02	4.224	71.4962		2.633	5.02	52.4502			-15		11		6
3.327	4.469	74.4462		2.837	3.776	75.1324		3.265	4.265	76.5533
4.204	5.653	74.3676		4.102	4.673	87.7809		4.122	5.306	77.6856			-7		18		13
2.429	3.735	65.0335		2.082	3.796	54.8472		2.327	3.388	68.6836
3.429	4.122	83.1878		3.449	4.796	71.9141		3.122	3.918	79.6835			-3		19		14
3.163	4.571	69.1971		3.163	4.571	69.1971		3.98	6.082	65.439
3.857	4.449	86.6936		3.265	4.286	76.1783		3.061	4.306	71.0869			10		34		29
1.796	3.429	52.3768		1.796	3.429	52.3768		1.633	3.612	45.2104
3.347	4.653	71.9321		2.816	4.408	63.8838		3.449	4.959	69.5503			0		21		19
2.98	4.49	66.3697		2.918	4.041	72.2098		3.102	4.327	71.6894
2.837	4.939	57.4408		3.265	4.469	73.0588		3.061	4.796	63.824			-16		15		14
4.367	5.265	82.944		3.388	4.714	71.871		3.735	5.224	71.4969
3.245	5.082	63.8528		3.224	4.796	67.2227		3.51	5.449	64.4155			-4		17		17
2.061	3.531	58.3687		1.939	3.224	60.1427		1.796	3.347	53.66
2.918	4.816	60.5897		2.714	4.265	63.6342		2.939	4.592	64.0026			-10		18		14
3.245	4.306	75.36		3.02	4.224	71.4962		3.061	4.816	63.559
3.245	4.551	71.303		3.163	4.184	75.5975		3.755	4.612	81.418			-11		5		1
4.102	5.143	79.7589		3.551	4.327	82.0661		4.306	5.653	76.1719
2.959	4.633	63.8679		2.714	4.327	62.7224		3.184	5	63.68			-2		16		16
2.939	4.286	68.5721		3.306	4.367	75.7041		3.816	4.959	76.951
3.061	4.061	75.3755		3	3.959	75.7767		3.184	4.408	72.2323			-13		8		12
2.653	4.02	65.995		2.041	3.102	65.7963		2.735	3.592	76.1414
3.755	4.49	83.6303		3.306	4.551	72.6434		3.49	4.51	77.3836			2		21		19
2.592	3.204	80.8989		2.469	3.408	72.4472		2.816	3.959	71.1291
3.878	4.796	80.859		3.122	4.204	74.2626		3.571	4.551	78.4663			-17		5		5
3.598	3.987	90.2433		3.388	3.939	86.0117		3.531	4.469	79.011
4.265	4.735	90.0739		3.449	4.633	74.4442		4	5.184	77.1605			5		23		21
3.918	4.694	83.4683		3.265	4.204	77.6641		4.347	4.939	88.0138
2.571	4.163	61.7583		2.612	3.98	65.6281		2.878	4.714	61.0522			-3		22		22
3.673	4.51	81.4412		3.408	4.163	81.864		3.143	4.878	64.4321
3.408	4.571	74.557		3.653	4.612	79.2064		4.102	4.959	82.7183			0		16		19
2.367	4.755	49.7792		2.082	4.429	47.0084		1.959	4.102	47.7572
2.429	3.898	62.314		2.51	3.653	68.7106		2.429	3.959	61.3539			5		25		30
4.143	4.959	83.5451		3.98	5	79.6		4.082	5.735	71.177
3.755	4.49	83.6303		3.224	4.102	78.5958		3.816	5.184	73.6111			-10		9		9
3.082	4.286	71.9085		3.347	4.143	80.7869		3.469	4.878	71.1152
3.245	4.408	73.6162		2.939	4.122	71.3003		3.245	4.612	70.3599			-14		10		8
3.449	4.327	79.7088		3.061	3.531	86.6893		3.327	4.408	75.4764
2.939	3.857	76.1991		2.612	3.694	70.7093		2.98	4.02	74.1294			-15		5		5
3.612	4.776	75.6281		3.347	4.592	72.8876		3.102	4.49	69.0869
3.531	4.776	73.9322		3.265	4.633	70.4727		3.408	4.429	76.9474			-11		14		6
2.02	3.061	65.9915		2.163	3.02	71.6225		2.204	3.592	61.3586
3.408	5.347	63.7367		2.633	4.122	63.8768		2.755	4.469	61.6469			-14		6		2
3.245	4.224	76.8229		3.02	4.224	71.4962		2.633	5.02	52.4502
3.327	4.469	74.4462		2.837	3.776	75.1324		3.265	4.265	76.5533			-5		11		6
4.204	5.653	74.3676		4.102	4.673	87.7809		4.122	5.306	77.6856
3.347	4.776	70.0796		2.918	4.735	61.6262		3.551	5.408	65.662			3		18		15
2.857	4.367	65.4225		2.735	3.429	79.7609		3.102	4.735	65.5121
3.061	3.673	83.3379		2.857	3.633	78.6402		2.98	3.653	81.5768			-8		5		5
2.449	3.408	71.8603		2.755	3.633	75.8326		2.265	3.327	68.0794
3.041	4.143	73.4009		2.776	3.959	70.1187		2.49	4.122	60.4076			-22		-4		-5
2.714	4.061	66.8308		2.592	3.714	69.79		2.714	4.592	59.1028
3.265	4.388	74.4075		2.918	4.449	65.5878		3.082	4.429	69.5868			-8		13		4
3.215	4.215	76.2752		3	3.571	84.0101		2.959	3.796	77.9505
2.694	4.714	57.1489		2.918	3.98	73.3166		3.245	4.449	72.9377			-18		12		-1
2.857	3.918	72.9199		2.694	3.898	69.1124		3.408	4.122	82.6783
3.061	4.204	72.8116		2.939	4.082	71.999		2.816	4.286	65.7023			16		31		30
3.082	4.367	70.5748		2.796	4.388	63.7192		2.98	4.612	64.6141
2.939	4.122	71.3003		2.918	4.776	61.0972		3.51	5.755	60.9904			-11		15		6
1.857	3.02	61.4901		2.306	3.449	66.86		2.286	3.633	62.9232
2.776	4.633	59.918		3.184	4.673	68.1361		2.918	4.959	58.8425			-2		10		10
3.735	4.429	84.3305		3.449	4.612	74.7832		2.898	5.184	55.9028
3.633	4.98	72.9518		3.388	4.653	72.8132		3.939	5.449	72.2885			-16		-6		-1
3.163	4.51	70.133		2.714	4.388	61.8505		3.837	4.755	80.694
2.224	3.592	61.9154		2.388	3.673	65.015		2.51	3.531	71.0847			-12		12		12
3.388	4.531	74.7738		3.265	4.592	71.1019		3.673	4.633	79.2791
3.204	5.122	62.5537		3.204	5.122	62.5537		3.959	6.367	62.18			-24		-9		-13
3.163	5.061	62.4975		2.959	4.816	61.441		3.122	5	62.44
2.388	3.837	62.2361		2.388	3.837	62.2361		2.122	4.245	49.9882			-28		-5		-3
1.959	4.755	41.1987		2.987	3.577	83.5057		2.163	4.551	47.528
2.367	4.102	57.7036		2.776	4.571	60.7307		2.51	4.184	59.9904			-24		0		9
2.408	4.388	54.8769		2.204	3.98	55.3769		2.531	4.408	57.4183
2.429	3.735	65.0335		2.082	3.796	54.8472		2.327	3.388	68.6836			-7		16		8
3.429	4.122	83.1878		3.449	4.796	71.9141		3.122	3.918	79.6835
3.163	4.571	69.1971		3.163	4.571	69.1971		3.98	6.082	65.439			-12		13		2
3.857	4.449	86.6936		3.265	4.286	76.1783		3.061	4.306	71.0869
1.796	3.429	52.3768		1.796	3.429	52.3768		1.633	3.612	45.2104			-2		26		17
2.408	4.837	49.7829		2.569	3.469	74.0559		2.429	4.551	53.3729
2.408	3.918	61.4599		2.265	4.286	52.8465		2.735	4.347	62.917			-10		5		7
2.898	3.653	79.3321		2.551	4.143	61.5737		2.429	3.816	63.653
2.326	3.568	65.1906		2.228	3.668	60.7415		2.803	3.291	85.1717			-6		15		9
3.102	4.215	73.5943		3.015	4.514	66.7922		3.409	4.644	73.4065
1.956	3.01	64.9834		1.882	3.892	48.3556		2.112	3.251	64.9646			-19		9		4
1.992	3.221	61.8441		1.99	3.733	53.3083		2.891	3.224	89.6712
2.745	3.596	76.3348		2.456	4.793	51.2414		3.796	4.442	85.457			-9		11		7
3.567	4.691	76.0392		3.188	4.102	77.7182		3.236	4.115	78.6391
													-18		-2		-8
